# Supplementary material
Source: PubMed Central journal article supplement (PMC9344435)
Supplement: fon-18-2475-s1.pdf [file fon-18-2475-s1.pdf]

# A Phase II Trial of the Super-enhancer Inhibitor Minnelide in Advanced Refractory Adenosquamous Carcinoma of the Pancreas (ASCP)

## Authors

Nebojsa Skorupan, Mehwish I. Ahmad, Seth M. Steinberg, Jane B. Trepel, Derek Cridebring, Haiyong Han, Daniel D. Von Hoff, Christine Alewine

Trial registration no:  
NCT04896073

## Study design

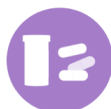

Oral drug

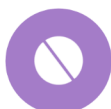

No placebo

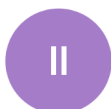

Phase II trial

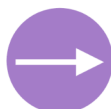

Single arm

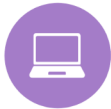

Televisits possible

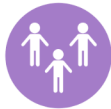

Up to 25 patients

- Minnelide is a small molecule anti-superenhancer drug that inhibits MYC
- Trial will be conducted using a Simon optimal two-stage phase II trial design
- The first stage will enroll a total of 12 evaluable participants,
- If clinical benefit is shown, the accrual will continue to a total of 25 evaluable participants

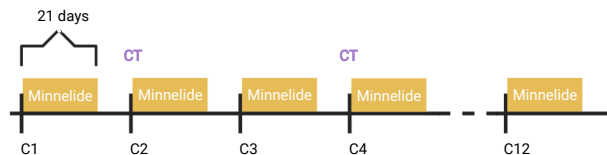

- Drug administration for 21 days of a 28-day cycle for 12 cycles until PD or unacceptable toxicity
- Imaging assessment every 2 cycles

## End points

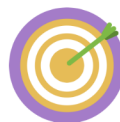

### Primary end point

Disease control rate (CR + PR + SD for  $\geq 16$  weeks)

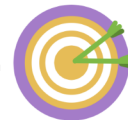

### Secondary end points

- Drug safety
- PFS
- OS

### Exploratory end points

Serial biopsies to assess effects on:

- Myc expression
- Accessibility of Myc and other superenhancer loci
- Tumor microenvironment – stroma and immune cells
- Post treatment
  - Changes in circulating tumor DNA
  - Circulating immune cell populations

## Key eligibility criteria

18

Age 18 years

ECOG PS 0 or 1

ECOG PS 0 or 1

RECIST v1.1

Measurable disease per RECIST v1.1

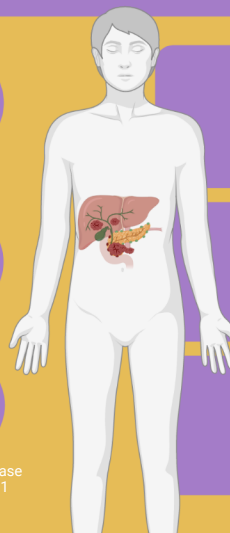

Histologically confirmed ASCP, having  $\geq 30\%$  malignant squamous component

Presence of metastatic, recurrent, or locally advanced unresectable disease

Progression or intolerance  $\geq 1$  prior systemic treatment for advanced disease

## Glossary

ASCP: Adenosquamous carcinoma of the pancreas; PD: progressive disease; CR: Complete response; PR: partial response; SD: stable disease; PFS: Progression free survival; OS: Overall survival; ECOG PS: Eastern Cooperative Oncology Group; RECIST: Response Evaluation Criteria in Solid Tumors; TMB: Tumor mutational burden
